# Supplementary material for: G-computation, propensity score-based methods, and targeted maximum likelihood estimator for causal inference with different covariates sets: a comparative simulation study
Source: PubMed Central journal article supplement (PMC7280276; doi:10.1038/s41598-020-65917-x), 2020-06-08
Supplement: 41598_2020_65917_MOESM1_ESM.pdf [file 41598_2020_65917_MOESM1_ESM.pdf]

# G-computation, propensity score-based methods, and targeted maximum likelihood estimator for causal inference with different covariates sets: a comparative simulation study

Arthur Chatton<sup>1,2</sup>, Florent Le Borgne<sup>1,2</sup>, Clémence Leyrat<sup>1,3</sup>, Florence Gillaizeau<sup>1,4</sup>, Chloé Rousseau<sup>1,4,5</sup>, Laetitia Barbin<sup>4</sup>, David Laplaud<sup>4,6</sup>, Maxime Léger<sup>1,7</sup>, Bruno Giraudeau<sup>1,8</sup>, and Yohann Foucher<sup>1,4,\*</sup>

<sup>1</sup>INSERM UMR 1246 - SPHERE, Université de Nantes, Université de Tours, Nantes, France.

<sup>2</sup>A2COM-IDBC, Pacé, France.

<sup>3</sup>Department of Medical Statistics & Cancer Survival Group, London School of Hygiene and Tropical Medicine, London, UK.

<sup>4</sup>Centre Hospitalier Universitaire de Nantes, Nantes, France.

<sup>5</sup>INSERM CIC1414, CHU Rennes, Rennes, France.

<sup>6</sup>Centre de Recherche en Transplantation et Immunologie INSERM UMR1064, Université de Nantes, Nantes, France.

<sup>7</sup>Département d'Anesthésie-Réanimation, Centre Hospitalier Universitaire d'Angers, Angers, France.

<sup>8</sup>INSERM CIC1415, CHRU de Tours, Tours, France.

\*Yohann.Foucher@univ-nantes.fr

## ABSTRACT

Controlling for confounding bias is crucial in causal inference. Distinct methods are currently employed to mitigate the effects of confounding bias. Each requires the introduction of a set of covariates, which remains difficult to choose, especially regarding the different methods. We conduct a simulation study to compare the relative performance results obtained by using four different sets of covariates (those causing the outcome, those causing the treatment allocation, those causing both the outcome and the treatment allocation, and all the covariates) and four methods: g-computation, inverse probability of treatment weighting, full matching and targeted maximum likelihood estimator. Our simulations are in the context of a binary treatment, a binary outcome and baseline confounders. The simulations suggest that considering all the covariates causing the outcome led to the lowest bias and variance, particularly for g-computation. The consideration of all the covariates did not decrease the bias but significantly reduced the power. We apply these methods to two real-world examples that have clinical relevance, thereby illustrating the real-world importance of using these methods. We propose an R package *RISCA* to encourage the use of g-computation in causal inference.

## Supplementary Materials

R code for RISCA use:

```
library(RISCA)

#data simulation
#treatment = 1 if the patients have been the treatment of interest and 0 otherwise
treatment <- rbinom(600, 1, prob=0.5)
covariate <- rnorm(600, 0, 1)
covariate[treatment==1] <- rnorm(sum(treatment==1), 0.3, 1)
outcome <- rbinom(600, 1, prob=1/(1+exp(-2-0.26*treatment-0.7*covariate)))
tab <- data.frame(outcome, treatment, covariate)

#Raw effect of the treatment
```

```
glm.raw <- glm(outcome ~ treatment, data=tab, family = binomial(link=logit))
summary(glm.raw)

#Conditional effect of the treatment
glm.multi <- glm(outcome ~ treatment + covariate, data=tab, family = binomial)
summary(glm.multi)

#Marginal effects of the treatment (ATE)
gc.ate <- GC.Logistic(glm.obj=glm.multi, data=tab, group="treatment", effect="ATE",
var.method="simulations", iterations=1000)

#Sum-up of the 3 ORs
data.frame( raw=exp(glm.raw$coefficients[2]),
conditional=exp(glm.multi$coefficients[2]),
marginal.ate=exp(gc.ate$logOR[,1]) )
```

| n    | method | set       | mean bias |         |             |        | logOR |       |          |        |
|------|--------|-----------|-----------|---------|-------------|--------|-------|-------|----------|--------|
|      |        |           | $\pi_0$   | $\pi_1$ | $\Delta\pi$ | logOR  | MSE   | VEB   | coverage | type I |
| 100  | GC     | outcome   | 0.001     | 0.000   | -0.001      | -0.002 | 0.396 | -7.1  | 93.1     | 5.6    |
|      |        | treatment | 0.000     | 0.001   | 0.001       | 0.005  | 0.457 | -7.7  | 92.8     | 5.7    |
|      |        | common    | 0.001     | -0.000  | -0.001      | -0.003 | 0.419 | -5.2  | 93.6     | 5.3    |
|      |        | entire    | 0.000     | 0.001   | 0.001       | 0.005  | 0.439 | -10.9 | 91.7     | 6.3    |
|      | IPTW   | outcome   | -0.000    | 0.001   | 0.002       | 0.009  | 0.455 | 11.5  | 97.3     | 2.7    |
|      |        | treatment | -0.004    | 0.005   | 0.008       | 0.037  | 0.599 | -4.9  | 94.7     | 5.3    |
|      |        | common    | -0.000    | 0.001   | 0.001       | 0.006  | 0.462 | 7.6   | 96.6     | 3.5    |
|      |        | entire    | -0.004    | 0.005   | 0.009       | 0.040  | 0.622 | -5.6  | 95.1     | 5.0    |
|      | TMLE   | outcome   | 0.001     | 0.000   | -0.000      | 0.001  | 0.432 | -14.7 | 89.8     | 10.2   |
|      |        | treatment | -0.003    | 0.005   | 0.008       | 0.037  | 0.549 | -23.8 | 85.0     | 15.0   |
|      |        | common    | 0.001     | -0.000  | -0.001      | -0.003 | 0.452 | -9.8  | 91.4     | 8.6    |
|      |        | entire    | -0.004    | 0.006   | 0.009       | 0.044  | 0.533 | -30.6 | 81.3     | 18.7   |
|      | FM     | outcome   | -0.002    | 0.004   | 0.006       | 0.029  | 0.530 | -21.9 | 88.1     | 11.9   |
|      |        | treatment | -0.006    | 0.007   | 0.013       | 0.062  | 0.648 | -35.4 | 79.8     | 20.1   |
|      |        | common    | -0.002    | 0.003   | 0.005       | 0.026  | 0.534 | -22.6 | 87.7     | 12.3   |
|      |        | entire    | -0.007    | 0.007   | 0.014       | 0.067  | 0.653 | -35.7 | 79.7     | 20.2   |
| 300  | GC     | outcome   | -0.001    | 0.000   | 0.001       | 0.005  | 0.217 | -2.2  | 94.7     | 5.2    |
|      |        | treatment | -0.001    | 0.001   | 0.001       | 0.006  | 0.251 | -2.0  | 94.5     | 5.2    |
|      |        | common    | -0.001    | 0.000   | 0.001       | 0.004  | 0.234 | -1.7  | 94.5     | 5.3    |
|      |        | entire    | -0.001    | 0.001   | 0.001       | 0.006  | 0.235 | -3.0  | 94.4     | 5.1    |
|      | IPTW   | outcome   | -0.001    | 0.001   | 0.002       | 0.008  | 0.236 | 19.3  | 98.1     | 1.9    |
|      |        | treatment | -0.002    | 0.001   | 0.003       | 0.012  | 0.319 | 5.8   | 96.2     | 3.8    |
|      |        | common    | -0.001    | 0.001   | 0.002       | 0.008  | 0.249 | 12.0  | 97.0     | 3.0    |
|      |        | entire    | -0.002    | 0.001   | 0.003       | 0.012  | 0.314 | 9.2   | 97.1     | 2.9    |
|      | TMLE   | outcome   | -0.001    | 0.000   | 0.001       | 0.004  | 0.230 | -3.6  | 93.9     | 6.1    |
|      |        | treatment | -0.001    | 0.001   | 0.002       | 0.011  | 0.301 | -10.3 | 91.3     | 8.7    |
|      |        | common    | -0.001    | 0.000   | 0.001       | 0.004  | 0.246 | -2.5  | 94.0     | 6.0    |
|      |        | entire    | -0.001    | 0.001   | 0.003       | 0.011  | 0.281 | -12.5 | 90.3     | 9.7    |
|      | FM     | outcome   | -0.001    | 0.001   | 0.002       | 0.010  | 0.285 | -17.8 | 89.4     | 10.6   |
|      |        | treatment | -0.003    | 0.002   | 0.006       | 0.025  | 0.374 | -37.0 | 78.5     | 21.5   |
|      |        | common    | -0.001    | 0.000   | 0.001       | 0.007  | 0.305 | -23.1 | 87.2     | 12.7   |
|      |        | entire    | -0.004    | 0.003   | 0.006       | 0.028  | 0.359 | -34.4 | 80.5     | 19.5   |
| 500  | GC     | outcome   | -0.000    | -0.000  | -0.000      | -0.000 | 0.169 | -2.4  | 94.2     | 5.8    |
|      |        | treatment | -0.000    | -0.000  | 0.000       | 0.002  | 0.196 | -2.6  | 94.2     | 5.7    |
|      |        | common    | -0.000    | -0.000  | 0.000       | 0.000  | 0.182 | -2.1  | 94.5     | 5.5    |
|      |        | entire    | -0.000    | -0.000  | 0.000       | 0.001  | 0.182 | -3.0  | 93.9     | 5.8    |
|      | IPTW   | outcome   | -0.001    | -0.000  | 0.001       | 0.003  | 0.181 | 18.6  | 98.0     | 2.0    |
|      |        | treatment | -0.001    | 0.000   | 0.001       | 0.005  | 0.244 | 6.7   | 96.5     | 3.5    |
|      |        | common    | -0.001    | 0.000   | 0.001       | 0.003  | 0.192 | 11.3  | 97.1     | 2.9    |
|      |        | entire    | -0.001    | -0.000  | 0.001       | 0.003  | 0.237 | 11.3  | 97.0     | 3.0    |
|      | TMLE   | outcome   | -0.000    | -0.000  | -0.000      | -0.000 | 0.178 | -3.5  | 93.6     | 6.4    |
|      |        | treatment | -0.001    | -0.000  | 0.000       | 0.002  | 0.232 | -7.2  | 92.1     | 8.0    |
|      |        | common    | -0.000    | -0.000  | 0.000       | 0.000  | 0.191 | -2.7  | 94.3     | 5.8    |
|      |        | entire    | -0.001    | -0.000  | 0.000       | 0.001  | 0.216 | -8.7  | 91.5     | 8.5    |
|      | FM     | outcome   | -0.001    | -0.000  | 0.000       | 0.002  | 0.216 | -16.3 | 90.2     | 9.8    |
|      |        | treatment | -0.003    | 0.001   | 0.004       | 0.015  | 0.295 | -38.5 | 77.5     | 22.6   |
|      |        | common    | -0.000    | -0.000  | 0.000       | 0.002  | 0.260 | -30.4 | 83.2     | 16.9   |
|      |        | entire    | -0.002    | 0.001   | 0.003       | 0.014  | 0.284 | -36.1 | 79.2     | 20.8   |
| 2000 | GC     | outcome   | -0.000    | 0.000   | 0.000       | 0.001  | 0.083 | -1.0  | 94.7     | 5.5    |
|      |        | treatment | 0.000     | 0.000   | 0.000       | 0.001  | 0.096 | -0.7  | 94.8     | 5.2    |
|      |        | common    | 0.000     | 0.000   | 0.000       | 0.001  | 0.090 | -0.7  | 94.9     | 5.3    |
|      |        | entire    | -0.000    | 0.000   | 0.000       | 0.002  | 0.089 | -0.8  | 94.8     | 5.4    |
|      | IPTW   | outcome   | -0.000    | 0.001   | 0.001       | 0.004  | 0.089 | 20.1  | 98.1     | 1.8    |
|      |        | treatment | -0.000    | 0.000   | 0.001       | 0.002  | 0.116 | 11.5  | 97.1     | 2.9    |
|      |        | common    | -0.000    | 0.001   | 0.001       | 0.003  | 0.094 | 12.9  | 97.2     | 2.8    |
|      |        | entire    | -0.000    | 0.000   | 0.001       | 0.003  | 0.111 | 16.7  | 97.7     | 2.2    |
|      | TMLE   | outcome   | 0.000     | 0.000   | 0.000       | 0.001  | 0.087 | -1.3  | 94.3     | 5.6    |
|      |        | treatment | 0.000     | 0.000   | 0.000       | 0.001  | 0.111 | -0.8  | 94.7     | 5.4    |
|      |        | common    | 0.000     | 0.000   | 0.000       | 0.001  | 0.093 | -0.6  | 94.7     | 5.3    |
|      |        | entire    | -0.000    | 0.000   | 0.001       | 0.002  | 0.104 | -1.6  | 94.3     | 5.7    |
|      | FM     | outcome   | -0.000    | 0.000   | 0.000       | 0.002  | 0.126 | -28.5 | 84.1     | 15.9   |
|      |        | treatment | -0.000    | 0.001   | 0.001       | 0.005  | 0.162 | -44.4 | 72.3     | 27.7   |
|      |        | common    | -0.000    | 0.000   | 0.000       | 0.002  | 0.197 | -54.2 | 62.7     | 37.2   |
|      |        | entire    | -0.000    | 0.001   | 0.001       | 0.004  | 0.137 | -33.9 | 80.7     | 19.4   |

Simulation results comparing the ATE estimation under the null hypothesis.

| n    | method    | set       | mean bias |         |             |        | logOR |       |          |       |
|------|-----------|-----------|-----------|---------|-------------|--------|-------|-------|----------|-------|
|      |           |           | $\pi_0$   | $\pi_1$ | $\Delta\pi$ | logOR  | MSE   | VEB   | coverage | power |
| 100  | GC        | outcome   | 0.002     | -0.000  | -0.003      | 0.000  | 0.526 | -10.9 | 93.1     | 6.7   |
|      |           | treatment | 0.002     | -0.000  | -0.003      | -0.001 | 0.584 | -10.4 | 93.1     | 6.3   |
|      |           | common    | 0.003     | -0.000  | -0.003      | -0.002 | 0.555 | -9.2  | 93.6     | 6.4   |
|      |           | entire    | 0.001     | -0.000  | -0.001      | 0.003  | 0.562 | -13.4 | 91.8     | 7.5   |
|      | IPTW      | outcome   | 0.003     | -0.000  | -0.004      | -0.010 | 0.579 | 6.5   | 96.6     | 3.2   |
|      |           | treatment | 0.002     | -0.000  | -0.002      | -0.011 | 0.715 | -4.3  | 94.4     | 5.5   |
|      |           | common    | 0.004     | -0.000  | -0.005      | -0.011 | 0.593 | 1.6   | 95.9     | 4.0   |
|      |           | entire    | -0.001    | -0.000  | 0.001       | -0.006 | 0.744 | -4.8  | 94.5     | 5.5   |
|      | TMLE      | outcome   | 0.003     | -0.000  | -0.004      | -0.022 | 0.696 | 30.6  | 95.9     | 3.9   |
|      |           | treatment | 0.003     | -0.000  | -0.004      | -0.037 | 0.875 | 210.4 | 99.2     | 0.7   |
|      |           | common    | 0.004     | -0.000  | -0.004      | -0.022 | 0.709 | 5.3   | 94.3     | 5.6   |
|      |           | entire    | 0.001     | -0.000  | -0.001      | -0.028 | 0.884 | 498.8 | 99.5     | 0.5   |
| FM   | outcome   | -0.001    | -0.000    | 0.001   | 0.005       | 0.662  | -20.6 | 88.9  | 11.3     |       |
|      | treatment | -0.004    | -0.000    | 0.004   | 0.010       | 0.817  | -35.3 | 79.5  | 20.2     |       |
|      | common    | 0.000     | -0.000    | -0.000  | 0.002       | 0.658  | -20.3 | 89.0  | 11.0     |       |
|      | entire    | -0.005    | -0.000    | 0.005   | 0.010       | 0.835  | -36.6 | 78.5  | 21.4     |       |
| 300  | GC        | outcome   | -0.000    | 0.000   | 0.000       | 0.004  | 0.268 | -2.2  | 94.7     | 5.1   |
|      |           | treatment | -0.000    | 0.000   | 0.000       | 0.003  | 0.305 | -3.0  | 94.4     | 5.3   |
|      |           | common    | 0.000     | 0.000   | 0.000       | 0.003  | 0.290 | -2.5  | 94.7     | 5.3   |
|      |           | entire    | -0.000    | 0.000   | 0.001       | 0.004  | 0.282 | -3.0  | 94.7     | 5.1   |
|      | IPTW      | outcome   | 0.000     | 0.000   | -0.000      | 0.001  | 0.287 | 16.0  | 98.0     | 2.0   |
|      |           | treatment | -0.002    | 0.000   | 0.002       | 0.008  | 0.365 | 4.7   | 96.1     | 3.9   |
|      |           | common    | 0.000     | 0.000   | -0.000      | 0.001  | 0.307 | 7.6   | 96.8     | 3.2   |
|      |           | entire    | -0.002    | 0.000   | 0.003       | 0.008  | 0.353 | 10.4  | 97.1     | 2.9   |
|      | TMLE      | outcome   | -0.001    | 0.000   | 0.001       | 0.003  | 0.347 | -11.2 | 92.1     | 7.9   |
|      |           | treatment | -0.001    | 0.000   | 0.001       | -0.001 | 0.451 | 71.6  | 99.3     | 0.7   |
|      |           | common    | -0.001    | 0.000   | 0.002       | 0.005  | 0.371 | -14.7 | 90.9     | 9.1   |
|      |           | entire    | -0.001    | 0.000   | 0.001       | -0.003 | 0.427 | 106.5 | 99.6     | 0.4   |
| FM   | outcome   | -0.001    | 0.000     | 0.002   | 0.005       | 0.338  | -13.8 | 90.9  | 9.1      |       |
|      | treatment | -0.004    | 0.000     | 0.004   | 0.011       | 0.444  | -34.2 | 80.3  | 19.8     |       |
|      | common    | -0.002    | 0.000     | 0.002   | 0.007       | 0.351  | -17.0 | 89.9  | 10.1     |       |
|      | entire    | -0.004    | 0.000     | 0.004   | 0.011       | 0.437  | -33.2 | 81.8  | 18.2     |       |
| 500  | GC        | outcome   | 0.000     | -0.001  | -0.001      | -0.003 | 0.203 | -0.7  | 95.0     | 5.0   |
|      |           | treatment | 0.001     | -0.001  | -0.002      | -0.006 | 0.232 | -1.6  | 94.8     | 5.1   |
|      |           | common    | 0.001     | -0.001  | -0.002      | -0.005 | 0.221 | -1.3  | 94.8     | 4.9   |
|      |           | entire    | 0.000     | -0.001  | -0.001      | -0.005 | 0.215 | -1.4  | 94.8     | 5.2   |
|      | IPTW      | outcome   | 0.001     | -0.001  | -0.002      | -0.008 | 0.219 | 16.6  | 97.9     | 2.1   |
|      |           | treatment | 0.001     | -0.001  | -0.002      | -0.008 | 0.276 | 6.2   | 96.2     | 3.8   |
|      |           | common    | 0.001     | -0.001  | -0.002      | -0.009 | 0.233 | 8.8   | 96.7     | 3.2   |
|      |           | entire    | 0.000     | -0.001  | -0.001      | -0.007 | 0.265 | 11.7  | 97.0     | 3.0   |
|      | TMLE      | outcome   | -0.000    | -0.001  | -0.001      | -0.005 | 0.264 | -15.8 | 90.0     | 10.0  |
|      |           | treatment | 0.001     | -0.001  | -0.002      | -0.012 | 0.341 | 51.5  | 99.0     | 1.0   |
|      |           | common    | -0.000    | -0.001  | -0.001      | -0.004 | 0.283 | -17.2 | 89.4     | 10.6  |
|      |           | entire    | 0.001     | -0.001  | -0.002      | -0.011 | 0.320 | 69.4  | 99.4     | 0.6   |
| FM   | outcome   | -0.000    | -0.001    | -0.001  | -0.004      | 0.254  | -11.7 | 92.1  | 7.9      |       |
|      | treatment | -0.001    | -0.001    | -0.000  | -0.004      | 0.337  | -33.2 | 80.9  | 19.1     |       |
|      | common    | 0.000     | -0.001    | -0.001  | -0.005      | 0.276  | -18.5 | 89.2  | 10.7     |       |
|      | entire    | -0.000    | -0.001    | -0.001  | -0.006      | 0.324  | -30.6 | 82.7  | 17.3     |       |
| 2000 | GC        | outcome   | 0.000     | 0.000   | 0.000       | 0.000  | 0.102 | -1.7  | 94.4     | 5.8   |
|      |           | treatment | 0.000     | 0.000   | -0.000      | -0.000 | 0.115 | -0.9  | 94.9     | 5.2   |
|      |           | common    | 0.000     | 0.000   | -0.000      | -0.000 | 0.110 | -1.1  | 95.1     | 4.9   |
|      |           | entire    | 0.000     | 0.000   | 0.000       | 0.001  | 0.107 | -1.6  | 94.3     | 5.8   |
|      | IPTW      | outcome   | 0.001     | 0.000   | -0.001      | -0.005 | 0.108 | 15.9  | 97.6     | 2.4   |
|      |           | treatment | 0.000     | 0.000   | -0.000      | -0.000 | 0.132 | 8.8   | 96.4     | 3.6   |
|      |           | common    | 0.001     | 0.000   | -0.001      | -0.005 | 0.115 | 9.0   | 96.6     | 3.4   |
|      |           | entire    | 0.000     | 0.000   | 0.000       | 0.000  | 0.127 | 13.9  | 97.3     | 2.7   |
|      | TMLE      | outcome   | 0.000     | 0.000   | -0.000      | -0.001 | 0.129 | -19.2 | 88.3     | 11.7  |
|      |           | treatment | 0.000     | 0.000   | 0.000       | -0.001 | 0.164 | 34.4  | 99.0     | 1.0   |
|      |           | common    | 0.000     | 0.000   | -0.000      | -0.000 | 0.138 | -18.7 | 88.6     | 11.4  |
|      |           | entire    | 0.000     | 0.000   | 0.000       | -0.000 | 0.154 | 37.2  | 99.1     | 0.9   |
| FM   | outcome   | 0.000     | 0.000     | 0.000   | 0.000       | 0.129  | -13.3 | 91.0  | 9.0      |       |
|      | treatment | 0.000     | 0.000     | 0.000   | -0.001      | 0.196  | -43.1 | 73.4  | 26.7     |       |
|      | common    | 0.000     | 0.000     | -0.000  | -0.001      | 0.144  | -22.6 | 87.5  | 12.6     |       |
|      | entire    | 0.000     | 0.000     | 0.000   | -0.001      | 0.155  | -28.1 | 84.0  | 16.0     |       |

Simulation results comparing the ATT estimation under the null hypothesis.

| n    | method    | set       | mean bias |         |             |       | logOR |       |          |        |
|------|-----------|-----------|-----------|---------|-------------|-------|-------|-------|----------|--------|
|      |           |           | $\pi_0$   | $\pi_1$ | $\Delta\pi$ | logOR | MSE   | VEB   | coverage | type I |
| 100  | GC        | outcome   | -0.113    | -0.000  | 0.113       | 0.471 | 0.686 | -5.1  | 83.3     | 16.8   |
|      |           | treatment | -0.123    | -0.000  | 0.123       | 0.512 | 0.754 | -5.7  | 83.6     | 15.9   |
|      |           | common    | -0.113    | -0.000  | 0.112       | 0.468 | 0.702 | -3.6  | 85.4     | 14.9   |
|      |           | entire    | -0.124    | -0.000  | 0.124       | 0.516 | 0.739 | -7.9  | 81.1     | 18.0   |
|      | IPTW      | outcome   | -0.113    | -0.000  | 0.113       | 0.471 | 0.699 | 9.5   | 90.7     | 9.5    |
|      |           | treatment | -0.126    | -0.000  | 0.126       | 0.526 | 0.804 | 1.6   | 87.6     | 12.9   |
|      |           | common    | -0.113    | -0.000  | 0.112       | 0.467 | 0.710 | 3.9   | 89.3     | 10.9   |
|      |           | entire    | -0.127    | -0.000  | 0.127       | 0.531 | 0.813 | 4.3   | 89.0     | 11.4   |
|      | TMLE      | outcome   | -0.113    | -0.000  | 0.113       | 0.473 | 0.771 | 1.2   | 87.2     | 13.1   |
|      |           | treatment | -0.129    | -0.000  | 0.129       | 0.548 | 0.929 | 35.3  | 93.5     | 6.8    |
|      |           | common    | -0.113    | -0.000  | 0.113       | 0.471 | 0.766 | 4.1   | 87.9     | 12.4   |
|      |           | entire    | -0.128    | -0.000  | 0.128       | 0.545 | 0.933 | 119.1 | 96.2     | 3.9    |
| FM   | outcome   | -0.115    | -0.000    | 0.115   | 0.480       | 0.764 | -12.9 | 82.1  | 18.3     |        |
|      | treatment | -0.127    | -0.000    | 0.127   | 0.536       | 0.886 | -26.3 | 75.0  | 25.4     |        |
|      | common    | -0.114    | -0.000    | 0.113   | 0.474       | 0.765 | -13.9 | 82.3  | 18.0     |        |
|      | entire    | -0.129    | -0.000    | 0.129   | 0.546       | 0.891 | -26.1 | 74.0  | 26.4     |        |
| 300  | GC        | outcome   | -0.115    | -0.000  | 0.115       | 0.470 | 0.544 | -2.5  | 57.7     | 42.2   |
|      |           | treatment | -0.126    | -0.000  | 0.126       | 0.513 | 0.598 | -3.2  | 59.3     | 40.9   |
|      |           | common    | -0.115    | -0.000  | 0.115       | 0.469 | 0.553 | -2.6  | 62.8     | 37.8   |
|      |           | entire    | -0.126    | -0.000  | 0.125       | 0.513 | 0.588 | -3.8  | 54.2     | 45.2   |
|      | IPTW      | outcome   | -0.115    | -0.000  | 0.115       | 0.471 | 0.547 | 11.3  | 69.2     | 31.0   |
|      |           | treatment | -0.129    | -0.000  | 0.129       | 0.527 | 0.621 | 3.0   | 66.4     | 33.7   |
|      |           | common    | -0.115    | -0.000  | 0.115       | 0.469 | 0.555 | 3.7   | 68.2     | 31.9   |
|      |           | entire    | -0.129    | -0.000  | 0.129       | 0.528 | 0.614 | 9.3   | 67.9     | 32.2   |
|      | TMLE      | outcome   | -0.116    | -0.000  | 0.116       | 0.475 | 0.568 | 1.6   | 67.9     | 32.2   |
|      |           | treatment | -0.134    | -0.000  | 0.134       | 0.551 | 0.678 | -7.8  | 65.3     | 34.9   |
|      |           | common    | -0.116    | -0.000  | 0.116       | 0.474 | 0.576 | 4.2   | 72.0     | 28.1   |
|      |           | entire    | -0.134    | -0.000  | 0.134       | 0.549 | 0.666 | 1.8   | 68.4     | 31.8   |
| FM   | outcome   | -0.115    | -0.000    | 0.115   | 0.471       | 0.568 | -8.2  | 62.7  | 37.5     |        |
|      | treatment | -0.130    | -0.000    | 0.129   | 0.530       | 0.652 | -23.3 | 54.3  | 45.9     |        |
|      | common    | -0.115    | -0.000    | 0.115   | 0.471       | 0.580 | -14.3 | 61.7  | 38.4     |        |
|      | entire    | -0.131    | -0.000    | 0.130   | 0.535       | 0.653 | -22.4 | 53.7  | 46.4     |        |
| 500  | GC        | outcome   | -0.116    | -0.000  | 0.115       | 0.470 | 0.515 | -1.9  | 37.9     | 61.7   |
|      |           | treatment | -0.127    | -0.000  | 0.126       | 0.514 | 0.565 | -1.8  | 39.0     | 60.4   |
|      |           | common    | -0.116    | -0.000  | 0.116       | 0.471 | 0.522 | -1.7  | 42.6     | 57.5   |
|      |           | entire    | -0.126    | -0.000  | 0.126       | 0.513 | 0.558 | -2.3  | 33.6     | 65.8   |
|      | IPTW      | outcome   | -0.116    | -0.000  | 0.115       | 0.470 | 0.516 | 11.6  | 49.8     | 9.5    |
|      |           | treatment | -0.130    | -0.000  | 0.130       | 0.530 | 0.585 | 4.1   | 46.8     | 52.8   |
|      |           | common    | -0.116    | -0.000  | 0.116       | 0.472 | 0.523 | 4.4   | 48.9     | 50.4   |
|      |           | entire    | -0.130    | -0.000  | 0.130       | 0.528 | 0.578 | 11.2  | 47.7     | 51.5   |
|      | TMLE      | outcome   | -0.116    | -0.000  | 0.116       | 0.473 | 0.529 | 2.7   | 50.8     | 48.5   |
|      |           | treatment | -0.136    | -0.000  | 0.136       | 0.555 | 0.631 | -12.5 | 44.0     | 55.7   |
|      |           | common    | -0.117    | -0.000  | 0.117       | 0.476 | 0.538 | 5.2   | 55.9     | 43.4   |
|      |           | entire    | -0.135    | -0.000  | 0.135       | 0.551 | 0.619 | -7.5  | 43.1     | 56.4   |
| FM   | outcome   | -0.116    | -0.000    | 0.116   | 0.473       | 0.533 | -8.7  | 44.4  | 55.1     |        |
|      | treatment | -0.131    | -0.000    | 0.131   | 0.534       | 0.608 | -23.3 | 36.8  | 62.7     |        |
|      | common    | -0.117    | -0.000    | 0.117   | 0.476       | 0.544 | -15.2 | 44.2  | 55.4     |        |
|      | entire    | -0.131    | -0.000    | 0.130   | 0.532       | 0.603 | -21.1 | 37.0  | 62.5     |        |
| 2000 | GC        | outcome   | -0.115    | 0.000   | 0.115       | 0.465 | 0.477 | -0.6  | 0.5      | 99.5   |
|      |           | treatment | -0.126    | 0.000   | 0.126       | 0.509 | 0.522 | -0.7  | 0.7      | 99.3   |
|      |           | common    | -0.115    | 0.000   | 0.115       | 0.466 | 0.479 | -0.5  | 1.1      | 99.0   |
|      |           | entire    | -0.126    | 0.000   | 0.126       | 0.508 | 0.520 | -0.8  | 0.3      | 99.7   |
|      | IPTW      | outcome   | -0.115    | 0.000   | 0.115       | 0.465 | 0.477 | 11.7  | 1.1      | 98.9   |
|      |           | treatment | -0.129    | 0.000   | 0.129       | 0.522 | 0.536 | 4.5   | 1.1      | 98.9   |
|      |           | common    | -0.115    | 0.000   | 0.115       | 0.466 | 0.479 | 4.8   | 1.6      | 98.4   |
|      |           | entire    | -0.129    | 0.000   | 0.129       | 0.521 | 0.534 | 10.9  | 0.9      | 99.1   |
|      | TMLE      | outcome   | -0.116    | 0.000   | 0.116       | 0.468 | 0.482 | 4.8   | 2.4      | 97.6   |
|      |           | treatment | -0.135    | 0.000   | 0.135       | 0.546 | 0.565 | -16.3 | 1.7      | 98.4   |
|      |           | common    | -0.116    | 0.000   | 0.116       | 0.469 | 0.485 | 5.8   | 4.1      | 95.9   |
|      |           | entire    | -0.135    | 0.000   | 0.135       | 0.545 | 0.563 | -15.6 | 0.8      | 99.2   |
| FM   | outcome   | -0.115    | 0.000     | 0.115   | 0.465       | 0.481 | -9.7  | 2.2   | 97.8     |        |
|      | treatment | -0.129    | 0.000     | 0.129   | 0.523       | 0.547 | -29.2 | 2.2   | 97.8     |        |
|      | common    | -0.115    | 0.000     | 0.115   | 0.466       | 0.484 | -15.6 | 2.9   | 97.1     |        |
|      | entire    | -0.130    | 0.000     | 0.130   | 0.524       | 0.542 | -19.2 | 1.2   | 98.8     |        |

Simulation results comparing the ATT estimation under the null hypothesis in the presence of an unmeasured confounder.

| n    | method    | set       | mean bias |         |             |       | logOR |       |          |       |
|------|-----------|-----------|-----------|---------|-------------|-------|-------|-------|----------|-------|
|      |           |           | $\pi_0$   | $\pi_1$ | $\Delta\pi$ | logOR | MSE   | VEB   | coverage | power |
| 100  | GC        | outcome   | -0.112    | -0.002  | 0.111       | 0.493 | 0.716 | -2.7  | 86.3     | 50.7  |
|      |           | treatment | -0.123    | -0.002  | 0.122       | 0.538 | 0.786 | -3.6  | 85.5     | 46.0  |
|      |           | common    | -0.112    | -0.002  | 0.111       | 0.492 | 0.735 | -1.7  | 87.8     | 45.6  |
|      |           | entire    | -0.123    | -0.002  | 0.121       | 0.538 | 0.768 | -5.5  | 83.5     | 50.7  |
|      | IPTW      | outcome   | -0.113    | -0.002  | 0.111       | 0.494 | 0.727 | 11.7  | 92.7     | 36.6  |
|      |           | treatment | -0.126    | -0.002  | 0.125       | 0.553 | 0.837 | 2.9   | 89.1     | 36.3  |
|      |           | common    | -0.113    | -0.002  | 0.111       | 0.494 | 0.743 | 5.6   | 90.8     | 38.4  |
|      |           | entire    | -0.126    | -0.002  | 0.124       | 0.553 | 0.838 | 6.0   | 90.4     | 33.9  |
|      | TMLE      | outcome   | -0.113    | -0.002  | 0.111       | 0.498 | 0.794 | 16.1  | 94.3     | 26.3  |
|      |           | treatment | -0.129    | -0.002  | 0.128       | 0.575 | 0.955 | 38.1  | 97.1     | 16.6  |
|      |           | common    | -0.114    | -0.002  | 0.112       | 0.499 | 0.794 | 19.6  | 93.9     | 24.7  |
|      |           | entire    | -0.128    | -0.002  | 0.126       | 0.570 | 0.953 | 110.0 | 98.4     | 9.7   |
| FM   | outcome   | -0.114    | -0.002    | 0.113   | 0.503       | 0.787 | -9.0  | 85.0  | 45.1     |       |
|      | treatment | -0.128    | -0.002    | 0.127   | 0.567       | 0.911 | -22.5 | 76.6  | 49.4     |       |
|      | common    | -0.115    | -0.002    | 0.113   | 0.504       | 0.795 | -10.6 | 84.3  | 44.2     |       |
|      | entire    | -0.128    | -0.002    | 0.126   | 0.566       | 0.921 | -23.8 | 76.2  | 49.6     |       |
| 300  | GC        | outcome   | -0.118    | 0.001   | 0.119       | 0.476 | 0.557 | -1.0  | 62.7     | 94.6  |
|      |           | treatment | -0.128    | 0.001   | 0.129       | 0.517 | 0.607 | -1.2  | 63.1     | 91.0  |
|      |           | common    | -0.117    | 0.001   | 0.118       | 0.474 | 0.563 | 0.1   | 67.1     | 91.5  |
|      |           | entire    | -0.128    | 0.001   | 0.129       | 0.520 | 0.601 | -2.6  | 58.9     | 94.5  |
|      | IPTW      | outcome   | -0.117    | 0.001   | 0.119       | 0.476 | 0.558 | 12.1  | 73.5     | 88.9  |
|      |           | treatment | -0.131    | 0.001   | 0.132       | 0.530 | 0.629 | 4.3   | 69.6     | 85.3  |
|      |           | common    | -0.117    | 0.001   | 0.118       | 0.474 | 0.564 | 6.1   | 71.6     | 88.2  |
|      |           | entire    | -0.131    | 0.001   | 0.132       | 0.532 | 0.624 | 10.0  | 71.2     | 85.5  |
|      | TMLE      | outcome   | -0.118    | 0.001   | 0.119       | 0.479 | 0.579 | 16.8  | 80.9     | 78.8  |
|      |           | treatment | -0.135    | 0.001   | 0.137       | 0.551 | 0.685 | 1.0   | 75.7     | 76.8  |
|      |           | common    | -0.118    | 0.001   | 0.119       | 0.478 | 0.584 | 20.6  | 84.1     | 73.0  |
|      |           | entire    | -0.136    | 0.001   | 0.137       | 0.552 | 0.676 | 9.7   | 78.6     | 74.6  |
| FM   | outcome   | -0.118    | 0.001     | 0.119   | 0.478       | 0.580 | -6.1  | 66.5  | 88.5     |       |
|      | treatment | -0.131    | 0.001     | 0.132   | 0.532       | 0.658 | -20.2 | 58.4  | 87.3     |       |
|      | common    | -0.117    | 0.001     | 0.118   | 0.475       | 0.589 | -11.3 | 65.2  | 86.8     |       |
|      | entire    | -0.132    | 0.001     | 0.133   | 0.538       | 0.664 | -20.6 | 57.7  | 87.7     |       |
| 500  | GC        | outcome   | -0.115    | -0.001  | 0.114       | 0.457 | 0.509 | -1.5  | 45.4     | 99.4  |
|      |           | treatment | -0.125    | -0.001  | 0.125       | 0.500 | 0.556 | -0.5  | 46.3     | 99.0  |
|      |           | common    | -0.115    | -0.001  | 0.114       | 0.456 | 0.513 | -0.1  | 50.8     | 98.9  |
|      |           | entire    | -0.126    | -0.001  | 0.125       | 0.501 | 0.552 | -2.1  | 40.7     | 99.4  |
|      | IPTW      | outcome   | -0.115    | -0.001  | 0.114       | 0.457 | 0.509 | 11.1  | 56.6     | 98.7  |
|      |           | treatment | -0.129    | -0.001  | 0.128       | 0.513 | 0.574 | 5.0   | 53.3     | 97.7  |
|      |           | common    | -0.115    | -0.001  | 0.114       | 0.456 | 0.514 | 5.4   | 56.0     | 98.3  |
|      |           | entire    | -0.129    | -0.001  | 0.128       | 0.514 | 0.571 | 9.8   | 53.8     | 98.0  |
|      | TMLE      | outcome   | -0.115    | -0.001  | 0.114       | 0.458 | 0.521 | 18.1  | 69.4     | 95.6  |
|      |           | treatment | -0.134    | -0.001  | 0.133       | 0.536 | 0.618 | -2.3  | 57.4     | 94.8  |
|      |           | common    | -0.115    | -0.001  | 0.114       | 0.459 | 0.527 | 20.5  | 73.6     | 93.2  |
|      |           | entire    | -0.134    | -0.001  | 0.133       | 0.535 | 0.611 | 1.4   | 57.2     | 95.5  |
| FM   | outcome   | -0.115    | -0.001    | 0.114   | 0.458       | 0.525 | -7.5  | 51.9  | 98.0     |       |
|      | treatment | -0.129    | -0.001    | 0.129   | 0.517       | 0.597 | -20.3 | 43.0  | 97.6     |       |
|      | common    | -0.114    | -0.001    | 0.113   | 0.455       | 0.530 | -12.7 | 51.9  | 96.9     |       |
|      | entire    | -0.129    | -0.001    | 0.129   | 0.517       | 0.596 | -19.7 | 43.1  | 97.6     |       |
| 2000 | GC        | outcome   | -0.115    | 0.000   | 0.116       | 0.466 | 0.479 | -1.0  | 0.7      | 100.0 |
|      |           | treatment | -0.126    | 0.000   | 0.126       | 0.510 | 0.524 | -0.7  | 0.9      | 100.0 |
|      |           | common    | -0.115    | 0.000   | 0.115       | 0.466 | 0.480 | -0.5  | 1.6      | 100.0 |
|      |           | entire    | -0.126    | 0.000   | 0.126       | 0.510 | 0.523 | -0.7  | 0.3      | 100.0 |
|      | IPTW      | outcome   | -0.115    | 0.000   | 0.115       | 0.465 | 0.478 | 10.7  | 1.7      | 100.0 |
|      |           | treatment | -0.129    | 0.000   | 0.130       | 0.523 | 0.539 | 4.2   | 1.6      | 100.0 |
|      |           | common    | -0.115    | 0.000   | 0.115       | 0.466 | 0.480 | 4.3   | 2.3      | 100.0 |
|      |           | entire    | -0.129    | 0.000   | 0.130       | 0.523 | 0.537 | 10.6  | 1.2      | 100.0 |
|      | TMLE      | outcome   | -0.116    | 0.000   | 0.116       | 0.467 | 0.483 | 18.0  | 5.4      | 100.0 |
|      |           | treatment | -0.135    | 0.000   | 0.136       | 0.548 | 0.568 | -6.6  | 2.6      | 100.0 |
|      |           | common    | -0.116    | 0.000   | 0.116       | 0.469 | 0.486 | 18.6  | 8.3      | 100.0 |
|      |           | entire    | -0.135    | 0.000   | 0.135       | 0.546 | 0.565 | -4.6  | 1.7      | 100.0 |
| FM   | outcome   | -0.115    | 0.000     | 0.116   | 0.466       | 0.484 | -8.4  | 2.9   | 100.0    |       |
|      | treatment | -0.130    | 0.000     | 0.130   | 0.524       | 0.548 | -26.4 | 3.0   | 100.0    |       |
|      | common    | -0.115    | 0.000     | 0.115   | 0.466       | 0.485 | -13.9 | 3.7   | 100.0    |       |
|      | entire    | -0.130    | 0.000     | 0.130   | 0.525       | 0.543 | -16.3 | 1.4   | 100.0    |       |

Simulation results comparing the ATT estimation under the alternative hypothesis in the presence of an unmeasured confounder.

| n    | method    | set       | mean bias |         |             |       | logOR |       |          |        |
|------|-----------|-----------|-----------|---------|-------------|-------|-------|-------|----------|--------|
|      |           |           | $\pi_0$   | $\pi_1$ | $\Delta\pi$ | logOR | MSE   | VEB   | coverage | type I |
| 100  | GC        | outcome   | -0.058    | 0.057   | 0.115       | 0.479 | 0.628 | -6.4  | 74.9     | 23.4   |
|      |           | treatment | -0.065    | 0.065   | 0.131       | 0.546 | 0.716 | -7.7  | 74.3     | 23.3   |
|      |           | common    | -0.058    | 0.057   | 0.115       | 0.479 | 0.643 | -4.9  | 78.0     | 21.3   |
|      |           | entire    | -0.065    | 0.066   | 0.131       | 0.547 | 0.704 | -10.0 | 70.8     | 26.0   |
|      | IPTW      | outcome   | -0.058    | 0.057   | 0.115       | 0.481 | 0.638 | 9.6   | 85.0     | 15.0   |
|      |           | treatment | -0.065    | 0.065   | 0.130       | 0.548 | 0.754 | -1.6  | 80.4     | 19.6   |
|      |           | common    | -0.058    | 0.057   | 0.115       | 0.480 | 0.650 | 3.1   | 83.1     | 16.9   |
|      |           | entire    | -0.065    | 0.065   | 0.130       | 0.550 | 0.753 | 1.7   | 81.8     | 18.1   |
|      | TMLE      | outcome   | -0.058    | 0.057   | 0.115       | 0.479 | 0.635 | -6.5  | 75.5     | 24.4   |
|      |           | treatment | -0.065    | 0.064   | 0.130       | 0.548 | 0.746 | -11.8 | 74.2     | 25.8   |
|      |           | common    | -0.058    | 0.057   | 0.115       | 0.480 | 0.649 | -4.1  | 79.4     | 20.6   |
|      |           | entire    | -0.065    | 0.065   | 0.130       | 0.549 | 0.735 | -16.9 | 68.7     | 31.3   |
| FM   | outcome   | -0.058    | 0.056     | 0.115   | 0.483       | 0.687 | -15.1 | 75.3  | 24.7     |        |
|      | treatment | -0.068    | 0.067     | 0.135   | 0.575       | 0.823 | -28.8 | 65.1  | 34.9     |        |
|      | common    | -0.060    | 0.057     | 0.116   | 0.491       | 0.707 | -18.3 | 74.1  | 25.9     |        |
|      | entire    | -0.068    | 0.067     | 0.135   | 0.574       | 0.818 | -28.0 | 65.3  | 34.7     |        |
| 300  | GC        | outcome   | -0.056    | 0.056   | 0.113       | 0.462 | 0.513 | -1.4  | 45.0     | 55.1   |
|      |           | treatment | -0.064    | 0.064   | 0.128       | 0.528 | 0.586 | -1.5  | 44.8     | 55.1   |
|      |           | common    | -0.056    | 0.056   | 0.112       | 0.461 | 0.518 | -0.6  | 50.8     | 49.7   |
|      |           | entire    | -0.064    | 0.064   | 0.128       | 0.528 | 0.580 | -2.6  | 38.4     | 61.1   |
|      | IPTW      | outcome   | -0.057    | 0.056   | 0.113       | 0.462 | 0.515 | 12.7  | 57.0     | 43.0   |
|      |           | treatment | -0.064    | 0.063   | 0.127       | 0.524 | 0.592 | 4.0   | 54.9     | 45.1   |
|      |           | common    | -0.056    | 0.056   | 0.112       | 0.461 | 0.520 | 5.9   | 56.5     | 43.6   |
|      |           | entire    | -0.064    | 0.063   | 0.127       | 0.525 | 0.587 | 9.6   | 56.0     | 44.1   |
|      | TMLE      | outcome   | -0.057    | 0.056   | 0.112       | 0.462 | 0.514 | -1.2  | 45.9     | 54.2   |
|      |           | treatment | -0.064    | 0.063   | 0.127       | 0.522 | 0.589 | -3.0  | 49.8     | 50.3   |
|      |           | common    | -0.056    | 0.056   | 0.112       | 0.461 | 0.519 | -0.2  | 51.8     | 48.3   |
|      |           | entire    | -0.064    | 0.063   | 0.127       | 0.522 | 0.583 | -4.6  | 44.1     | 56.0   |
| FM   | outcome   | -0.057    | 0.056     | 0.113   | 0.465       | 0.534 | -10.3 | 50.2  | 49.9     |        |
|      | treatment | -0.064    | 0.064     | 0.129   | 0.532       | 0.624 | -27.4 | 41.2  | 58.9     |        |
|      | common    | -0.056    | 0.056     | 0.112   | 0.464       | 0.562 | -25.4 | 49.8  | 50.3     |        |
|      | entire    | -0.065    | 0.064     | 0.129   | 0.534       | 0.622 | -25.6 | 41.2  | 58.9     |        |
| 500  | GC        | outcome   | -0.057    | 0.056   | 0.113       | 0.462 | 0.494 | -2.1  | 23.2     | 76.8   |
|      |           | treatment | -0.065    | 0.064   | 0.129       | 0.528 | 0.564 | -2.0  | 22.6     | 77.3   |
|      |           | common    | -0.057    | 0.056   | 0.113       | 0.462 | 0.498 | -1.9  | 29.1     | 71.2   |
|      |           | entire    | -0.065    | 0.064   | 0.129       | 0.527 | 0.559 | -2.5  | 17.5     | 82.1   |
|      | IPTW      | outcome   | -0.057    | 0.056   | 0.113       | 0.462 | 0.494 | 11.3  | 33.3     | 66.6   |
|      |           | treatment | -0.065    | 0.063   | 0.128       | 0.524 | 0.565 | 3.2   | 32.4     | 67.4   |
|      |           | common    | -0.057    | 0.056   | 0.113       | 0.462 | 0.498 | 4.3   | 33.8     | 65.9   |
|      |           | entire    | -0.065    | 0.063   | 0.128       | 0.524 | 0.562 | 8.9   | 32.3     | 67.5   |
|      | TMLE      | outcome   | -0.057    | 0.056   | 0.113       | 0.462 | 0.494 | -1.6  | 24.0     | 75.8   |
|      |           | treatment | -0.065    | 0.063   | 0.127       | 0.523 | 0.563 | -2.6  | 27.9     | 71.9   |
|      |           | common    | -0.057    | 0.056   | 0.113       | 0.462 | 0.498 | -1.4  | 29.6     | 70.1   |
|      |           | entire    | -0.064    | 0.063   | 0.127       | 0.522 | 0.559 | -3.2  | 22.4     | 77.4   |
| FM   | outcome   | -0.057    | 0.056     | 0.113   | 0.461       | 0.507 | -13.1 | 31.2  | 68.6     |        |
|      | treatment | -0.065    | 0.064     | 0.128   | 0.529       | 0.589 | -29.7 | 25.2  | 74.7     |        |
|      | common    | -0.057    | 0.056     | 0.113   | 0.463       | 0.540 | -34.1 | 35.4  | 64.5     |        |
|      | entire    | -0.065    | 0.063     | 0.128   | 0.528       | 0.582 | -25.3 | 23.8  | 76.1     |        |
| 2000 | GC        | outcome   | -0.057    | 0.056   | 0.113       | 0.460 | 0.468 | -0.9  | 0.0      | 100.0  |
|      |           | treatment | -0.065    | 0.064   | 0.128       | 0.525 | 0.534 | -0.7  | 0.0      | 100.0  |
|      |           | common    | -0.057    | 0.056   | 0.113       | 0.460 | 0.469 | -0.7  | 0.1      | 99.9   |
|      |           | entire    | -0.064    | 0.064   | 0.128       | 0.525 | 0.533 | -0.9  | 0.0      | 100.0  |
|      | IPTW      | outcome   | -0.057    | 0.056   | 0.113       | 0.459 | 0.468 | 12.1  | 0.1      | 99.9   |
|      |           | treatment | -0.064    | 0.063   | 0.127       | 0.520 | 0.530 | 4.6   | 0.2      | 99.8   |
|      |           | common    | -0.057    | 0.056   | 0.113       | 0.459 | 0.468 | 5.0   | 0.2      | 99.8   |
|      |           | entire    | -0.064    | 0.063   | 0.127       | 0.520 | 0.529 | 11.0  | 0.0      | 100.0  |
|      | TMLE      | outcome   | -0.057    | 0.056   | 0.113       | 0.459 | 0.467 | -0.8  | 0.0      | 100.0  |
|      |           | treatment | -0.064    | 0.063   | 0.127       | 0.518 | 0.528 | -1.0  | 0.1      | 99.9   |
|      |           | common    | -0.057    | 0.056   | 0.113       | 0.459 | 0.468 | -0.7  | 0.1      | 99.9   |
|      |           | entire    | -0.064    | 0.063   | 0.127       | 0.518 | 0.527 | -0.9  | 0.0      | 100.0  |
| FM   | outcome   | -0.057    | 0.056     | 0.112   | 0.459       | 0.479 | -34.3 | 1.9   | 98.1     |        |
|      | treatment | -0.064    | 0.063     | 0.127   | 0.521       | 0.549 | -48.2 | 2.5   | 97.5     |        |
|      | common    | -0.056    | 0.056     | 0.113   | 0.462       | 0.515 | -60.0 | 10.6  | 89.4     |        |
|      | entire    | -0.064    | 0.063     | 0.127   | 0.518       | 0.532 | -24.9 | 0.3   | 99.7     |        |

Simulation results comparing the ATE estimation under the null hypothesis in the presence of an unmeasured confounder.

| n    | method | set       | mean bias |         |             |       | logOR |       |          |       |       |
|------|--------|-----------|-----------|---------|-------------|-------|-------|-------|----------|-------|-------|
|      |        |           | $\pi_0$   | $\pi_1$ | $\Delta\pi$ | logOR | MSE   | VEB   | coverage | power |       |
| 100  | GC     | outcome   | -0.056    | 0.057   | 0.113       | 0.478 | 0.634 | -6.9  | 76.2     | 67.5  |       |
|      |        | treatment | -0.065    | 0.065   | 0.129       | 0.551 | 0.727 | -7.9  | 75.5     | 62.2  |       |
|      |        | common    | -0.057    | 0.057   | 0.113       | 0.479 | 0.650 | -5.2  | 79.2     | 62.8  |       |
|      |        | entire    | -0.065    | 0.065   | 0.129       | 0.550 | 0.714 | -10.6 | 71.6     | 67.0  |       |
|      | IPTW   | outcome   | -0.057    | 0.056   | 0.113       | 0.480 | 0.646 | 8.1   | 85.4     | 54.3  |       |
|      |        | treatment | -0.064    | 0.065   | 0.128       | 0.556 | 0.769 | -2.4  | 80.9     | 51.8  |       |
|      |        | common    | -0.057    | 0.056   | 0.113       | 0.482 | 0.657 | 2.9   | 84.2     | 55.5  |       |
|      |        | entire    | -0.063    | 0.065   | 0.128       | 0.556 | 0.773 | -0.7  | 82.0     | 50.1  |       |
|      | TMLE   | outcome   | -0.056    | 0.056   | 0.113       | 0.478 | 0.642 | -7.0  | 77.3     | 66.5  |       |
|      |        | treatment | -0.063    | 0.064   | 0.128       | 0.552 | 0.757 | -12.2 | 75.1     | 60.0  |       |
|      |        | common    | -0.057    | 0.056   | 0.113       | 0.481 | 0.657 | -4.1  | 80.6     | 60.8  |       |
|      |        | entire    | -0.063    | 0.065   | 0.128       | 0.553 | 0.748 | -17.6 | 69.6     | 66.6  |       |
|      | FM     | outcome   | -0.058    | 0.057   | 0.115       | 0.497 | 0.710 | -16.7 | 75.2     | 62.1  |       |
|      |        | treatment | -0.065    | 0.066   | 0.130       | 0.575 | 0.832 | -29.0 | 66.6     | 64.9  |       |
|      |        | common    | -0.056    | 0.057   | 0.114       | 0.491 | 0.713 | -18.5 | 75.0     | 61.4  |       |
|      |        | entire    | -0.065    | 0.066   | 0.131       | 0.577 | 0.830 | -28.4 | 66.2     | 65.3  |       |
|      | 300    | GC        | outcome   | -0.057  | 0.058       | 0.115 | 0.480 | 0.532 | -1.9     | 43.5  | 98.7  |
|      |        |           | treatment | -0.065  | 0.066       | 0.131 | 0.548 | 0.608 | -2.8     | 42.9  | 97.7  |
|      |        |           | common    | -0.057  | 0.058       | 0.115 | 0.480 | 0.539 | -1.9     | 48.7  | 97.8  |
|      |        |           | entire    | -0.065  | 0.066       | 0.131 | 0.547 | 0.600 | -2.9     | 37.1  | 98.9  |
| IPTW |        | outcome   | -0.057    | 0.058   | 0.115       | 0.480 | 0.533 | 12.4  | 55.3     | 97.6  |       |
|      |        | treatment | -0.064    | 0.066   | 0.130       | 0.546 | 0.615 | 3.0   | 53.1     | 94.2  |       |
|      |        | common    | -0.057    | 0.058   | 0.115       | 0.481 | 0.541 | 4.7   | 54.4     | 96.6  |       |
|      |        | entire    | -0.064    | 0.066   | 0.130       | 0.545 | 0.607 | 9.6   | 54.8     | 94.8  |       |
| TMLE |        | outcome   | -0.057    | 0.058   | 0.115       | 0.480 | 0.532 | -1.0  | 44.9     | 98.7  |       |
|      |        | treatment | -0.064    | 0.066   | 0.130       | 0.545 | 0.612 | -3.3  | 48.0     | 96.2  |       |
|      |        | common    | -0.057    | 0.058   | 0.115       | 0.481 | 0.540 | -1.1  | 50.1     | 97.6  |       |
|      |        | entire    | -0.064    | 0.066   | 0.130       | 0.543 | 0.603 | -3.4  | 42.8     | 97.9  |       |
| FM   |        | outcome   | -0.057    | 0.058   | 0.115       | 0.481 | 0.552 | -11.9 | 48.1     | 96.6  |       |
|      |        | treatment | -0.065    | 0.066   | 0.132       | 0.556 | 0.652 | -29.0 | 40.2     | 95.3  |       |
|      |        | common    | -0.057    | 0.058   | 0.115       | 0.486 | 0.588 | -27.4 | 47.6     | 93.1  |       |
|      |        | entire    | -0.065    | 0.067   | 0.132       | 0.557 | 0.644 | -25.5 | 39.1     | 96.0  |       |
| 300  |        | GC        | outcome   | -0.057  | 0.056       | 0.113 | 0.469 | 0.501 | -1.0     | 23.0  | 100.0 |
|      |        |           | treatment | -0.065  | 0.064       | 0.129 | 0.536 | 0.573 | -2.0     | 22.8  | 99.9  |
|      |        |           | common    | -0.057  | 0.056       | 0.113 | 0.468 | 0.505 | -1.0     | 29.0  | 99.9  |
|      |        |           | entire    | -0.065  | 0.064       | 0.129 | 0.536 | 0.569 | -1.9     | 17.5  | 100.0 |
|      | IPTW   | outcome   | -0.057    | 0.056   | 0.113       | 0.469 | 0.501 | 12.6  | 32.9     | 100.0 |       |
|      |        | treatment | -0.064    | 0.064   | 0.127       | 0.531 | 0.573 | 3.6   | 32.9     | 99.6  |       |
|      |        | common    | -0.057    | 0.056   | 0.113       | 0.468 | 0.505 | 5.1   | 33.7     | 99.9  |       |
|      |        | entire    | -0.064    | 0.064   | 0.127       | 0.532 | 0.569 | 10.2  | 32.6     | 99.6  |       |
|      | TMLE   | outcome   | -0.057    | 0.056   | 0.113       | 0.468 | 0.501 | -0.4  | 23.7     | 100.0 |       |
|      |        | treatment | -0.064    | 0.063   | 0.127       | 0.530 | 0.571 | -2.1  | 28.0     | 99.8  |       |
|      |        | common    | -0.057    | 0.056   | 0.113       | 0.468 | 0.505 | -0.5  | 29.3     | 99.9  |       |
|      |        | entire    | -0.064    | 0.064   | 0.127       | 0.530 | 0.566 | -1.9  | 22.9     | 99.9  |       |
|      | FM     | outcome   | -0.057    | 0.056   | 0.113       | 0.471 | 0.518 | -14.2 | 30.3     | 99.8  |       |
|      |        | treatment | -0.064    | 0.064   | 0.128       | 0.537 | 0.598 | -29.3 | 25.0     | 99.5  |       |
|      |        | common    | -0.057    | 0.056   | 0.113       | 0.475 | 0.555 | -35.3 | 34.9     | 98.4  |       |
|      |        | entire    | -0.064    | 0.064   | 0.128       | 0.537 | 0.592 | -25.2 | 23.4     | 99.6  |       |
|      | 300    | GC        | outcome   | -0.058  | 0.057       | 0.115 | 0.474 | 0.482 | -1.3     | 0.0   | 100.0 |
|      |        |           | treatment | -0.066  | 0.065       | 0.130 | 0.541 | 0.550 | -1.3     | 0.0   | 100.0 |
|      |        |           | common    | -0.058  | 0.057       | 0.115 | 0.474 | 0.483 | -0.7     | 0.1   | 100.0 |
|      |        |           | entire    | -0.066  | 0.065       | 0.131 | 0.541 | 0.550 | -1.7     | 0.0   | 100.0 |
| IPTW |        | outcome   | -0.058    | 0.057   | 0.115       | 0.474 | 0.482 | 11.3  | 0.1      | 100.0 |       |
|      |        | treatment | -0.065    | 0.064   | 0.129       | 0.536 | 0.547 | 3.7   | 0.1      | 100.0 |       |
|      |        | common    | -0.058    | 0.057   | 0.114       | 0.473 | 0.483 | 4.9   | 0.1      | 100.0 |       |
|      |        | entire    | -0.065    | 0.064   | 0.129       | 0.537 | 0.546 | 9.3   | 0.1      | 100.0 |       |
| TMLE |        | outcome   | -0.058    | 0.057   | 0.115       | 0.474 | 0.482 | -1.1  | 0.0      | 100.0 |       |
|      |        | treatment | -0.065    | 0.064   | 0.129       | 0.534 | 0.545 | -1.6  | 0.1      | 100.0 |       |
|      |        | common    | -0.058    | 0.057   | 0.114       | 0.473 | 0.483 | -0.7  | 0.1      | 100.0 |       |
|      |        | entire    | -0.065    | 0.064   | 0.129       | 0.535 | 0.544 | -2.1  | 0.0      | 100.0 |       |
| FM   |        | outcome   | -0.058    | 0.057   | 0.115       | 0.475 | 0.497 | -36.3 | 2.0      | 100.0 |       |
|      |        | treatment | -0.065    | 0.064   | 0.129       | 0.539 | 0.569 | -49.2 | 2.2      | 100.0 |       |
|      |        | common    | -0.058    | 0.057   | 0.115       | 0.479 | 0.534 | -60.7 | 9.7      | 100.0 |       |
|      |        | entire    | -0.065    | 0.064   | 0.129       | 0.535 | 0.549 | -26.0 | 0.2      | 100.0 |       |

Simulation results comparing the ATE estimation under the alternative hypothesis in the presence of an unmeasured confounder.



|                                                         | Relapse at 1 year | Fist-line treatment allocation* | Both | Nothing |
|---------------------------------------------------------|-------------------|---------------------------------|------|---------|
| Female patient                                          |                   |                                 |      | X       |
| At least one relapse 1 year before treatment initiation |                   |                                 | X    |         |
| Gd-enhancing lesion on MRI                              | X                 |                                 |      |         |
| EDSS score >3                                           |                   |                                 | X    |         |
| Previous immunomodulatory treatment                     |                   |                                 |      | X       |
| Patient age                                             | X                 |                                 |      |         |
| Disease duration                                        | X                 |                                 |      |         |

Classification of covariates in the multiple sclerosis application according to an expert knowledge. \*: No covariate is only associated with the treatment allocation, treatment and common sets are the same.

|                                               | Favourable GOS at 3 months | Barbiturates allocation | Both | Nothing |
|-----------------------------------------------|----------------------------|-------------------------|------|---------|
| Female patient                                |                            |                         |      | X       |
| Diabetes                                      |                            |                         | X    |         |
| Nosological entity: Severe trauma             |                            |                         | X    |         |
| SAP $\leq$ 90 mmHg before admission*          | X                          |                         |      |         |
| Evacuation of subdural or extradural hematoma |                            | X                       |      |         |
| External ventricular drain                    |                            | X                       |      |         |
| Evacuation of cerebral hematoma or lobectomy  |                            |                         | X    |         |
| Decompressive craniectomy                     |                            |                         | X    |         |
| Blood transfusion before admission            | X                          |                         |      |         |
| Pneumonia before increased ICP                |                            |                         | X    |         |
| Osmotherapy                                   | X                          |                         |      |         |
| GCS score $\geq$ 8*                           |                            |                         | X    |         |
| Patient age*                                  |                            |                         | X    |         |
| Haemoglobin                                   | X                          |                         |      |         |
| Platelets                                     |                            |                         |      | X       |
| Serum creatinine                              |                            |                         |      | X       |
| Arterial pH                                   |                            |                         | X    |         |
| Serum proteins                                |                            |                         |      | X       |
| Serum urea*                                   |                            |                         |      | X       |
| PaO <sub>2</sub> /FiO <sub>2</sub> ratio      |                            |                         | X    |         |
| SAPS II score                                 |                            |                         | X    |         |

Classification of covariates in the intensive care unit application according to an expert knowledge. \*: No include into a covariate set due to the association with the SAPS II Score.

| Set        | Characteristics                    | Overall    | Fingolimod | Natalizumab | STD (%) |
|------------|------------------------------------|------------|------------|-------------|---------|
| Outcome    | At least one relapse (n, %)        | 526.9 83.8 | 273.4 83.9 | 253.5 83.7  | 0.5     |
|            | EDSS score > 3 (n, %)              | 286.2 45.5 | 148.6 45.6 | 137.6 45.5  | 0.3     |
|            | Gd-enhancing lesion on MRI (n, %)  | 310.0 49.3 | 161.1 49.4 | 148.9 49.2  | 0.5     |
|            | Patient age, years (mean, sd)      | 37.1 9.6   | 37.2 9.9   | 37.1 9.3    | 1.2     |
|            | Disease duration, years (mean, sd) | 8.5 6.4    | 8.6 6.2    | 8.5 6.5     | 0.2     |
| Treatment* | At least one relapse (n, %)        | 526.2 83.7 | 272.7 83.7 | 253.5 83.6  | 0.1     |
|            | EDSS score > 3 (n, %)              | 288.5 45.9 | 149.5 45.9 | 139.0 45.8  | 0.1     |
| Common*    | At least one relapse (n, %)        | 526.2 83.7 | 272.7 83.7 | 253.5 83.6  | 0.1     |
|            | EDSS score > 3 (n, %)              | 288.5 45.9 | 149.5 45.9 | 139.0 45.8  | 0.1     |
| Entire     | Female patient (n, %)              | 481.4 76.6 | 250.2 76.8 | 231.2 76.4  | 0.9     |
|            | At least one relapse (n, %)        | 527.8 84.0 | 274.3 84.2 | 253.5 83.8  | 1.1     |
|            | Gd-enhancing lesion on MRI (n, %)  | 308.8 49.1 | 160.4 49.2 | 148.4 49.0  | 0.4     |
|            | EDSS score > 3 (n, %)              | 285.2 45.4 | 148.1 45.5 | 137.1 45.3  | 0.3     |
|            | Previous IMT (n, %)                | 555.7 88.4 | 288.2 88.5 | 267.5 88.4  | 0.2     |
|            | Patient age, years (mean, sd)      | 37.1 9.7   | 37.2 10.0  | 37.1 9.3    | 1.3     |
|            | Disease duration, years (mean, sd) | 8.6 6.4    | 8.6 6.4    | 8.6 6.4     | 0.6     |

The PS-adjusted samples for weighted analysis of the relapsing-remitting multiple sclerosis relapse in the year after the treatment initiation according to the covariate sets. Qualitative characteristics are presented by using the weighted effective (n) and the weighted percentage. Continuous characteristics are presented with weighted mean following by weighted standard deviation (sd). STD: Standardised differences in %, EDSS: Expanded Disability Status Scale, Gd: Gadolinium, MRI: Magnetic Resonance Imaging, and IMT: immunomodulatory treatment. \*: No covariate is only associated with the treatment allocation, treatment and common sets are the same.

| Set        | Characteristics                    | Overall    | Fingolimod | Natalizumab | STD (%) |
|------------|------------------------------------|------------|------------|-------------|---------|
| Outcome    | At least one relapse (n, %)        | 481.1 76.5 | 248.1 76.1 | 233.0 76.9  | 1.8     |
|            | EDSS score > 3 (n, %)              | 236.2 37.6 | 114.2 35.0 | 122.0 40.3  | 10.8    |
|            | Gd-enhancing lesion on MRI (n, %)  | 271.6 43.2 | 145.6 44.7 | 126.0 41.6  | 6.2     |
|            | Patient age, years (mean, sd)      | 36.6 9.6   | 36.0 9.8   | 37.2 9.2    | 12.2    |
|            | Disease duration, years (mean, sd) | 8.6 6.3    | 8.1 5.9    | 9.0 6.8     | 14.4    |
| Treatment* | At least one relapse (n, %)        | 483.7 76.9 | 250.7 76.9 | 233.0 76.9  | 0.0     |
|            | EDSS score > 3 (n, %)              | 253.3 40.3 | 131.3 40.3 | 122.0 40.3  | 0.0     |
| Common*    | At least one relapse (n, %)        | 483.7 76.9 | 250.7 76.9 | 233.0 76.9  | 0.0     |
|            | EDSS score > 3 (n, %)              | 253.3 40.3 | 131.3 40.3 | 122.0 40.3  | 0.0     |
| Entire     | Female patient (n, %)              | 483.8 76.9 | 258.8 79.4 | 225.0 74.3  | 12.2    |
|            | At least one relapse (n, %)        | 475.9 75.7 | 242.9 74.5 | 233.0 76.9  | 5.5     |
|            | Gd-enhancing lesion on MRI (n, %)  | 266.5 42.4 | 140.5 43.1 | 126.0 41.6  | 3.1     |
|            | EDSS score > 3 (n, %)              | 255.8 40.7 | 133.8 41.1 | 122.0 40.3  | 1.6     |
|            | Previous IMT (n, %)                | 545.6 86.7 | 282.6 86.7 | 263.0 86.8  | 0.3     |
|            | Patient age, years (mean, sd)      | 37.1 9.3   | 37.0 9.3   | 37.2 9.2    | 1.6     |
|            | Disease duration, years (mean, sd) | 8.9 6.5    | 8.8 6.3    | 9.0 6.8     | 3.5     |

The PS-adjusted samples for matched (FM) analysis of the relapsing-remitting multiple sclerosis relapse in the year after the treatment initiation according to the covariate sets. Qualitative characteristics are presented by using the matched effective (n) and the matched percentage. Continuous characteristics are presented with matched mean following by matched standard deviation (sd). STD: Standardised differences in %, EDSS: Expanded Disability Status Scale, Gd: Gadolinium, MRI: Magnetic Resonance Imaging, and IMT: immunomodulatory treatment. \*: No covariate is only associated with the treatment allocation, treatment and common sets are the same.

| Set                      | Characteristics                                      | Overall |       | Barbiturates |       | Control |       | STD (%) |
|--------------------------|------------------------------------------------------|---------|-------|--------------|-------|---------|-------|---------|
| Outcome                  | Diabetes (n, %)                                      | 4.1     | 2.7   | 2.1          | 2.7   | 2.0     | 2.7   | 0.2     |
|                          | Evacuation of cerebral hematoma or lobectomy (n, %)  | 29.2    | 19.6  | 15.2         | 20.3  | 14.0    | 18.9  | 3.4     |
|                          | Decompressive craniectomy (n, %)                     | 26.1    | 17.5  | 14.1         | 18.8  | 12.0    | 16.2  | 6.9     |
|                          | Blood transfusion before admission (n, %)            | 17.0    | 11.4  | 8.0          | 10.7  | 9.0     | 12.2  | 4.6     |
|                          | Osmotherapy (n, %)                                   | 74.2    | 49.9  | 37.2         | 49.8  | 37.0    | 50.0  | 0.4     |
|                          | Pneumonia before increased ICP (n, %)                | 26.3    | 17.7  | 13.3         | 17.8  | 13.0    | 17.6  | 0.7     |
|                          | Nosological entity: Severe trauma (n, %)             | 56.5    | 38.0  | 27.5         | 36.8  | 29.0    | 39.2  | 4.9     |
|                          | Haemoglobin, g/dL (mean, sd)                         | 12.1    | 2.3   | 12.2         | 2.2   | 12.1    | 2.5   | 0.6     |
|                          | Arterial pH (mean, sd)                               | 7.3     | 0.1   | 7.3          | 0.1   | 7.3     | 0.1   | 2.2     |
|                          | PaO2/FiO2 ratio (mean, sd)                           | 322.3   | 193.0 | 317.9        | 172.2 | 326.6   | 212.9 | 4.5     |
|                          | SAPS II score (mean, sd)                             | 47.9    | 11.5  | 48.3         | 10.1  | 47.6    | 12.9  | 6.3     |
| Treatment                | Diabetes (n, %)                                      | 4.0     | 2.7   | 2.0          | 2.7   | 2.0     | 2.7   | 0.3     |
|                          | Evacuation of subdural or extradural hematoma (n, %) | 16.2    | 10.8  | 8.2          | 10.9  | 8.0     | 10.8  | 0.2     |
|                          | External ventricular drain (n, %)                    | 52.1    | 34.9  | 27.1         | 35.9  | 25.0    | 33.8  | 4.5     |
|                          | Evacuation of cerebral hematoma or lobectomy (n, %)  | 28.8    | 19.3  | 14.8         | 19.6  | 14.0    | 18.9  | 1.8     |
|                          | Decompressive craniectomy (n, %)                     | 25.9    | 17.4  | 13.9         | 18.5  | 12.0    | 16.2  | 6.1     |
|                          | Pneumonia before increased ICP (n, %)                | 27.0    | 18.1  | 14.0         | 18.5  | 13.0    | 17.6  | 2.5     |
|                          | Nosological entity: Severe trauma (n, %)             | 57.1    | 38.2  | 28.1         | 37.3  | 29.0    | 39.2  | 3.9     |
|                          | Arterial pH (mean, sd)                               | 7.3     | 0.1   | 7.3          | 0.1   | 7.3     | 0.1   | 1.9     |
|                          | PaO2/FiO2 ratio (mean, sd)                           | 323.3   | 195.9 | 320.1        | 178.8 | 326.6   | 212.9 | 3.3     |
|                          | SAPS II score (mean, sd)                             | 47.8    | 11.5  | 48.0         | 10.0  | 47.6    | 12.9  | 4.2     |
| Common                   | Diabetes (n, %)                                      | 4.0     | 2.7   | 2.0          | 2.7   | 2.0     | 2.7   | 0.1     |
|                          | Evacuation of cerebral hematoma or lobectomy (n, %)  | 28.9    | 19.4  | 14.9         | 19.8  | 14.0    | 18.9  | 2.3     |
|                          | Decompressive craniectomy (n, %)                     | 25.3    | 17.0  | 13.3         | 17.8  | 12.0    | 16.2  | 4.1     |
|                          | Pneumonia before increased ICP (n, %)                | 26.5    | 17.8  | 13.5         | 18.0  | 13.0    | 17.6  | 1.2     |
|                          | Nosological entity: Severe trauma (n, %)             | 57.2    | 38.4  | 28.2         | 37.6  | 29.0    | 39.2  | 3.3     |
|                          | Arterial pH (mean, sd)                               | 7.3     | 0.1   | 7.3          | 0.1   | 7.3     | 0.1   | 3.6     |
|                          | PaO2/FiO2 ratio (mean, sd)                           | 323.8   | 192.8 | 321.1        | 172.0 | 326.6   | 212.9 | 2.9     |
|                          | SAPS II score (mean, sd)                             | 47.9    | 11.6  | 48.3         | 10.1  | 47.6    | 12.9  | 6.7     |
| Entire                   | Female patients (n, %)                               | 66.7    | 44.8  | 35.7         | 47.7  | 31.0    | 41.9  | 11.8    |
|                          | Diabetes (n, %)                                      | 4.0     | 2.7   | 2.0          | 2.7   | 2.0     | 2.7   | 0.2     |
|                          | Evacuation of subdural or extradural hematoma (n, %) | 15.4    | 10.3  | 7.4          | 9.9   | 8.0     | 10.8  | 3.0     |
|                          | External ventricular drain (n, %)                    | 52.3    | 35.2  | 27.3         | 36.5  | 25.0    | 33.8  | 5.8     |
|                          | Evacuation of cerebral hematoma or lobectomy (n, %)  | 30.6    | 20.5  | 16.6         | 22.2  | 14.0    | 18.9  | 8.0     |
|                          | Decompressive craniectomy (n, %)                     | 27.1    | 18.2  | 15.1         | 20.2  | 12.0    | 16.2  | 10.3    |
|                          | Blood transfusion before admission (n, %)            | 16.6    | 11.1  | 7.6          | 10.1  | 9.0     | 12.2  | 6.4     |
|                          | Osmotherapy (n, %)                                   | 75.3    | 50.6  | 38.3         | 51.2  | 37.0    | 50.0  | 2.4     |
|                          | Pneumonia before increased ICP (n, %)                | 26.2    | 17.6  | 13.2         | 17.6  | 13.0    | 17.6  | 0.1     |
|                          | Nosological entity: Severe trauma (n, %)             | 56.0    | 37.6  | 27.0         | 36.1  | 29.0    | 39.2  | 6.4     |
|                          | Haemoglobin, g/dL (mean, sd)                         | 12.2    | 2.3   | 12.2         | 2.2   | 12.1    | 2.5   | 4.5     |
|                          | Platelets, counts/mm <sup>3</sup> (mean, sd)         | 208.8   | 82.7  | 212.5        | 90.7  | 205.1   | 74.2  | 9.0     |
|                          | Serum creatinine, mmol/L (mean, sd)                  | 70.6    | 30.9  | 70.2         | 28.6  | 71.1    | 33.3  | 2.7     |
|                          | Arterial pH (mean, sd)                               | 7.3     | 0.1   | 7.3          | 0.1   | 7.3     | 0.1   | 0.5     |
|                          | Serum proteins, g/L (mean, sd)                       | 59.4    | 9.5   | 59.2         | 9.4   | 59.6    | 9.7   | 4.2     |
|                          | PaO2/FiO2 ratio (mean, sd)                           | 317.9   | 196.8 | 309.3        | 180.5 | 326.6   | 212.9 | 8.8     |
| SAPS II score (mean, sd) | 47.9                                                 | 11.5    | 48.2  | 10.1         | 47.6  | 12.9    | 5.5   |         |

The PS-adjusted samples for weighted analysis of dichotomised Glasgow Outcome Scale score at 3 months according to the covariate sets. Qualitative characteristics are presented by using the weighted effective (n) and the weighted percentage. Continuous characteristics are presented with weighted mean following by weighted standard deviation (sd). STD: Standardised differences in %, SAPS: Simplified Acute Physiology Score, ICP: Intracranial Pressure, PaO2: arterial partial Pressure of Oxygen, and FiO2: Fraction of Inspired Oxygen.

| Set                                                 | Characteristics                                      | Overall         |       | Barbiturates |       | Control |       | STD (%) |
|-----------------------------------------------------|------------------------------------------------------|-----------------|-------|--------------|-------|---------|-------|---------|
| Outcome                                             | Diabetes (n, %)                                      | 5.7             | 2.3   | 3.7          | 2.1   | 2.0     | 2.7   | 4.0     |
|                                                     | Evacuation of cerebral hematoma or lobectomy (n, %)  | 42.2            | 16.7  | 28.2         | 15.8  | 14.0    | 18.9  | 8.1     |
|                                                     | Decompressive craniectomy (n, %)                     | 39.5            | 15.7  | 27.5         | 15.5  | 12.0    | 16.2  | 2.0     |
|                                                     | Blood transfusion before admission (n, %)            | 28.2            | 11.2  | 19.2         | 10.8  | 9.0     | 12.2  | 4.3     |
|                                                     | Osmotherapy (n, %)                                   | 121.8           | 48.3  | 84.8         | 47.7  | 37.0    | 50.0  | 4.7     |
|                                                     | Pneumonia before increased ICP (n, %)                | 45.9            | 18.2  | 32.9         | 18.5  | 13.0    | 17.6  | 2.3     |
|                                                     | Nosological entity: Severe trauma (n, %)             | 95.0            | 37.7  | 66.0         | 37.1  | 29.0    | 39.2  | 4.4     |
|                                                     | Haemoglobin, g/dL (mean, sd)                         | 12.1            | 2.3   | 12.1         | 2.3   | 12.1    | 2.5   | 2.1     |
|                                                     | Arterial pH (mean, sd)                               | 7.4             | 0.1   | 7.4          | 0.1   | 7.3     | 0.1   | 7.6     |
|                                                     | PaO2/FiO2 ratio (mean, sd)                           | 313.1           | 174.0 | 307.4        | 155.4 | 326.6   | 212.9 | 10.3    |
|                                                     | SAPS II score (mean, sd)                             | 48.4            | 11.1  | 48.7         | 10.3  | 47.6    | 12.9  | 9.8     |
| Treatment                                           | Diabetes (n, %)                                      | 5.1             | 2.0   | 3.1          | 1.7   | 2.0     | 2.7   | 6.6     |
|                                                     | Evacuation of subdural or extradural hematoma (n, %) | 28.2            | 11.2  | 20.2         | 11.4  | 8.0     | 10.8  | 1.7     |
|                                                     | External ventricular drain (n, %)                    | 74.0            | 29.4  | 49.0         | 27.5  | 25.0    | 33.8  | 13.6    |
|                                                     | Evacuation of cerebral hematoma or lobectomy (n, %)  | 43.5            | 17.3  | 29.5         | 16.6  | 14.0    | 18.9  | 6.1     |
|                                                     | Decompressive craniectomy (n, %)                     | 45.6            | 18.1  | 33.6         | 18.9  | 12.0    | 16.2  | 6.9     |
|                                                     | Pneumonia before increased ICP (n, %)                | 41.5            | 16.5  | 28.5         | 16.0  | 13.0    | 17.6  | 4.2     |
|                                                     | Nosological entity: Severe trauma (n, %)             | 97.1            | 38.5  | 68.1         | 38.3  | 29.0    | 39.2  | 1.9     |
|                                                     | Arterial pH (mean, sd)                               | 7.4             | 0.1   | 7.4          | 0.1   | 7.3     | 0.1   | 12.4    |
|                                                     | PaO2/FiO2 ratio (mean, sd)                           | 318.2           | 180.0 | 314.7        | 165.0 | 326.6   | 212.9 | 6.3     |
|                                                     | SAPS II score (mean, sd)                             | 46.6            | 10.9  | 46.2         | 10.0  | 47.6    | 12.9  | 11.6    |
|                                                     | Common                                               | Diabetes (n, %) | 5.1   | 2.0          | 3.1   | 1.8     | 2.0   | 2.7     |
| Evacuation of cerebral hematoma or lobectomy (n, %) |                                                      | 51.6            | 20.5  | 37.6         | 21.1  | 14.0    | 18.9  | 5.5     |
| Decompressive craniectomy (n, %)                    |                                                      | 38.7            | 15.4  | 26.7         | 15.0  | 12.0    | 16.2  | 3.3     |
| Pneumonia before increased ICP (n, %)               |                                                      | 42.7            | 16.9  | 29.7         | 16.7  | 13.0    | 17.6  | 2.4     |
| Nosological entity: Severe trauma (n, %)            |                                                      | 57.2            | 38.4  | 28.2         | 37.6  | 29.0    | 39.2  | 3.3     |
| Arterial pH (mean, sd)                              |                                                      | 7.4             | 0.1   | 7.4          | 0.1   | 7.3     | 0.1   | 9.4     |
| PaO2/FiO2 ratio (mean, sd)                          |                                                      | 319.3           | 185.0 | 316.3        | 172.8 | 326.6   | 212.9 | 5.4     |
| SAPS II score (mean, sd)                            |                                                      | 48.2            | 10.8  | 48.4         | 9.9   | 47.6    | 12.9  | 7.4     |
| Entire                                              | Female patients (n, %)                               | 113.6           | 45.1  | 82.6         | 46.4  | 31.0    | 41.9  | 9.1     |
|                                                     | Diabetes (n, %)                                      | 8.0             | 3.2   | 6.0          | 3.4   | 2.0     | 2.7   | 3.8     |
|                                                     | Evacuation of subdural or extradural hematoma (n, %) | 23.5            | 9.3   | 15.5         | 8.7   | 8.0     | 10.8  | 7.1     |
|                                                     | External ventricular drain (n, %)                    | 104.0           | 41.3  | 79.0         | 44.4  | 25.0    | 33.8  | 21.9    |
|                                                     | Evacuation of cerebral hematoma or lobectomy (n, %)  | 44.3            | 17.6  | 30.3         | 17.0  | 14.0    | 18.9  | 5.0     |
|                                                     | Decompressive craniectomy (n, %)                     | 46.4            | 18.4  | 34.4         | 19.3  | 12.0    | 16.2  | 8.2     |
|                                                     | Blood transfusion before admission (n, %)            | 26.5            | 10.5  | 17.5         | 9.8   | 9.0     | 12.2  | 7.5     |
|                                                     | Osmotherapy (n, %)                                   | 109.6           | 43.5  | 72.6         | 40.8  | 37.0    | 50.0  | 18.6    |
|                                                     | Pneumonia before increased ICP (n, %)                | 45.5            | 18.1  | 32.5         | 18.3  | 13.0    | 17.6  | 1.8     |
|                                                     | Nosological entity: Severe trauma (n, %)             | 77.1            | 30.6  | 48.1         | 27.0  | 29.0    | 39.2  | 26.0    |
|                                                     | Haemoglobin, g/dL (mean, sd)                         | 12.5            | 2.4   | 12.7         | 2.3   | 12.1    | 2.5   | 23.8    |
|                                                     | Platelets, counts/mm <sup>3</sup> (mean, sd)         | 218.5           | 89.8  | 224.1        | 95.5  | 205.1   | 74.2  | 22.3    |
|                                                     | Serum creatinine, mmol/L (mean, sd)                  | 69.7            | 30.0  | 69.1         | 28.6  | 71.1    | 33.3  | 6.4     |
|                                                     | Arterial pH (mean, sd)                               | 7.3             | 0.1   | 7.3          | 0.1   | 7.3     | 0.1   | 4.7     |
|                                                     | Serum proteins, g/L (mean, sd)                       | 59.4            | 8.9   | 59.4         | 8.6   | 59.6    | 9.7   | 3.1     |
|                                                     | PaO2/FiO2 ratio (mean, sd)                           | 308.1           | 187.3 | 300.3        | 175.9 | 326.6   | 212.9 | 13.5    |
| SAPS II score (mean, sd)                            | 48.3                                                 | 11.1            | 48.7  | 10.2         | 47.6  | 12.9    | 9.7   |         |

The PS-adjusted samples for matched analysis (FM) of dichotomised Glasgow Outcome Scale score at 3 months according to the covariate sets. Qualitative characteristics are presented by using the matched effective (n) and the matched percentage. Continuous characteristics are presented with weighted mean following by matched standard deviation (sd). STD: Standardised differences in %, SAPS: Simplified Acute Physiology Score, ICP: Intracranial Pressure, PaO2: arterial partial Pressure of Oxygen, and FiO2: Fraction of Inspired Oxygen.
